# Supplementary material
Source: Springer Nature journal article supplement (https://www.springermedizin.de/resource/supplementary/12891_2013_1694_MOESM4_ESM.pdf/9508394)
Supplement: MOESM4 [file 9508394]

### 1+ or less:

- Complete protocol
- Progress as appropriate

### 2+ or larger:

- Hold protocol
- Treat patient for effusion
- Review effusion management

Next session:

### Trace or none:

- Progress as appropriate

### 1+:

- Maintain same level of protocol. Do not advance

### 2+:

- Hold protocol
- Treat effusion
- Notify the ACL-team

Next session:

### Trace or none:

- Progress as appropriate

### 1+:

- Progress as appropriate

### 2+:

- Hold protocol
- Treat effusion
- Notify the ACL-team
